# Supplementary material
Source: ML conference proceedings conference paper supplement (https://proceedings.neurips.cc/paper_files/paper/2019/hash/02f063c236c7eef66324b432b748d15d-Abstract.html)
Supplement: Supplementary file [file 02f063c236c7eef66324b432b748d15d-Supplemental.zip]

## A Proof of Theorem 1

*Proof.* As discussed above, we have two cases as follows.

**Case 1:** First we consider the case that  $w, u, v$  are from left to right, with their stationary points  $x_k^{(w)*} < x_k^{(u)*} < x_k^{(v)*}$ . A standard gradient descent update is  $\tilde{x} \leftarrow \tilde{x} - \eta \nabla_{x_k} f_y^{(u)}|_{x_k=\tilde{x}}$ . To ensure one step update could make  $\tilde{x}$  jump from  $u$  to  $v$ , we obtain:

$$\begin{aligned}
 & \tilde{x} - \eta \nabla_{x_k} f_y^{(u)}|_{x_k=\tilde{x}} \geq x_k^{(v)*} \\
 \Rightarrow & \tilde{x} - \eta \sum_{j=p}^{p+q} 2(\tilde{x} - y_j) \geq x_k^{(v)*} \quad (\text{use Equation 5}) \\
 \Rightarrow & (1 - 2\eta(q+1))\tilde{x} + 2\eta(q+1) \frac{1}{q+1} \sum_{j=p}^{p+q} y_j \geq x_k^{(v)*} \\
 \Rightarrow & (1 - 2\eta(q+1))\tilde{x} \geq x_k^{(v)*} - 2\eta(q+1)x_k^{(u)*} \quad (\text{use Equation 7})
 \end{aligned} \tag{11}$$

Now we have two possibilities:

**Possibility (a):**  $1 - 2\eta(q+1) > 0$ :

$$\text{Inequality 11} \Rightarrow \tilde{x} \geq \frac{x_k^{(v)*} - 2\eta(q+1)x_k^{(u)*}}{1 - 2\eta(q+1)}$$

To guarantee the gradient direction points to neighbor  $v$ , the starting point  $\tilde{x}$  has to be to the left of  $x_k^{(u)*}$ , thus:

$$\begin{aligned}
 & \frac{x_k^{(v)*} - 2\eta(q+1)x_k^{(u)*}}{1 - 2\eta(q+1)} \leq \tilde{x} < x_k^{(u)*} \\
 \Rightarrow & x_k^{(v)*} - 2\eta(q+1)x_k^{(u)*} < (1 - 2\eta(q+1))x_k^{(u)*} \\
 \Rightarrow & x_k^{(v)*} < x_k^{(u)*}
 \end{aligned} \tag{12}$$

This is contradictory to the assumption that  $x_k^{(w)*} < x_k^{(u)*} < x_k^{(v)*}$ , and thus is not valid.

**Possibility (b):**  $1 - 2\eta(q+1) < 0$ :

$$\text{Inequality 11} \Rightarrow \tilde{x} \leq \frac{x_k^{(v)*} - 2\eta(q+1)x_k^{(u)*}}{1 - 2\eta(q+1)}$$

Due to the fact that  $\tilde{x}$  is inside region  $u$ , which must be somewhere to the right of  $x_k^{(w)*}$  (with the assumption that  $w$  has a bowl-shape), we have:

$$\begin{aligned}
 & \frac{x_k^{(v)*} - 2\eta(q+1)x_k^{(u)*}}{1 - 2\eta(q+1)} \geq \tilde{x} > x_k^{(w)*} \\
 \Rightarrow & x_k^{(v)*} - 2\eta(q+1)x_k^{(u)*} < (1 - 2\eta(q+1))x_k^{(w)*} \\
 \Rightarrow & x_k^{(v)*} - x_k^{(w)*} < 2\eta(q+1)(x_k^{(u)*} - x_k^{(w)*}) \\
 \Rightarrow & \eta > \frac{1}{2(q+1)} \left( \frac{x_k^{(v)*} - x_k^{(w)*}}{x_k^{(u)*} - x_k^{(w)*}} \right)
 \end{aligned} \tag{13}$$

Recall that  $q$  is an integer and  $q \geq 0$ , thus

$$1 - 2\eta(q+1) < 0 \Rightarrow \eta > \frac{1}{2(q+1)} \tag{14}$$

Also notice that

$$x_k^{(w)*} < x_k^{(u)*} < x_k^{(v)*} \Rightarrow \frac{x_k^{(v)*} - x_k^{(w)*}}{x_k^{(u)*} - x_k^{(w)*}} > 1 \tag{15}$$

Putting Inequalities 13, 14 and 15 together, we obtain  $\eta > \frac{1}{2(q+1)}$ .

**Case 2:** here  $w, u, v$  are from right to left, and  $x_k^{(w)*} > x_k^{(u)*} > x_k^{(v)*}$ . This is very similar to Case 1, so we omit the details and provide the final result as

$$\eta > \frac{1}{2(q+1)} \left( \frac{x_k^{(w)*} - x_k^{(v)*}}{x_k^{(u)*} - x_k^{(v)*}} \right) \text{ and } \frac{x_k^{(w)*} - x_k^{(v)*}}{x_k^{(u)*} - x_k^{(v)*}} > 1 \quad (16)$$

We will arrive at the same result:  $\eta > \frac{1}{2(q+1)}$ .

Note that the length of the pattern  $x$  is  $l$  and the length of input  $y$  is  $n$ . As a result, the expected number of elements in  $y$  aligned to a single  $x_i$ ,  $i \in [0, l-1]$  should be  $n/l$ , i.e.  $\mathbb{E}[q] = n/l - 1$ . Taking expectation on both sides of the above inequality, we obtain  $\mathbb{E}[\eta] > \frac{1}{2(n/l-1+1)} = \frac{l}{2n}$ .  $\square$

**Corollary 1.** *With the same assumption of Theorem 1, let pattern  $x$  and input  $y$  have the same length, i.e.,  $n = l$ . In order to make one step jumping out of local region  $u$ , we should have  $\mathbb{E}[\eta] > \frac{1}{2}$ .*

## B Detailed Experimental Results for Multivariate DTWNet

Multivariate DTWs are often computed in two forms: MDTW-I and MDTW-D [21]. MDTW-I treats each dimension independently, so it is simply a stack of multiple univariate DTWs, thus directly applies to our method. MDTW-D needs to compute multivariate distance  $\text{mdtw}^2 = \sum \|\mathbf{x}_i - \mathbf{y}_j\|^2$ ,  $\mathbf{x}_i \in \mathbf{R}^m$ ,  $\mathbf{y}_j \in \mathbf{R}^m$  in the Dynamic Programming step, instead of the scaler version  $\sum \|x_i - y_j\|^2$ . As long as the norm is well defined, e.g., Euclidean distance, the forward pass and the backpropagation are performed in the same manner. We can even define other distances, as long as their gradients w.r.t. to the vector  $\mathbf{x}$  can be computed.

We run a 3-dim multivariate time series classification task here, using MDTW-D and Euclidean distance in our approach. The experiment settings follow Section 6.1 in the paper. The following figures show: one sample data (3-variate series) from each category, the learned kernel, test loss and test acc comparison. Our method (DTW) outperforms others.

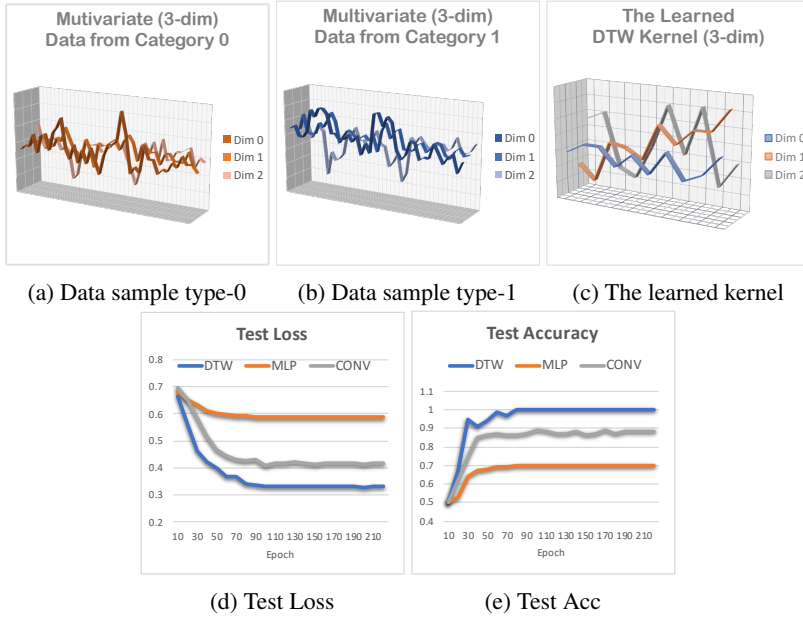

Figure 6: Multivariate DTWNet Experiment

## C Detailed Experimental Results for Barycenter Experiment

Table 2: Barycenter Experiment, Average DTW Loss on Training Set

|                                | SoftDTW<br>$\gamma = 1$ | SoftDTW<br>$\gamma = 0.1$ | SoftDTW<br>$\gamma = 0.01$ | SoftDTW<br>$\gamma = 0.001$ | SSG            | DBA           | Ours           |
|--------------------------------|-------------------------|---------------------------|----------------------------|-----------------------------|----------------|---------------|----------------|
| 50words                        | 7.337                   | 5.294                     | 5.375                      | 5.478                       | 4.904          | 4.604         | <b>4.415</b>   |
| Adiac                          | 0.246                   | 0.218                     | 0.219                      | 0.663                       | <b>0.133</b>   | 0.136         | 0.461          |
| ArrowHead                      | 2.713                   | 2.223                     | 1.690                      | 1.979                       | 1.856          | <b>1.555</b>  | 1.717          |
| Beef                           | 17.753                  | 9.260                     | 7.889                      | 8.617                       | 17.056         | 8.618         | <b>7.487</b>   |
| BeetleFly                      | 34.656                  | 23.368                    | 22.839                     | 23.729                      | 24.771         | 22.341        | <b>20.544</b>  |
| BirdChicken                    | 21.017                  | 10.711                    | 9.459                      | 11.982                      | 11.115         | 12.768        | <b>9.136</b>   |
| CBF                            | 22.421                  | 14.292                    | 12.891                     | 14.062                      | 11.086         | <b>11.039</b> | 11.592         |
| Car                            | 2.003                   | 1.252                     | 1.063                      | 1.386                       | <b>0.940</b>   | 1.089         | 1.230          |
| ChlorineConcentration          | 24.167                  | 14.339                    | 16.069                     | 15.773                      | <b>12.871</b>  | 13.227        | 13.829         |
| CinC_ECG_torso                 | 137.172                 | 99.014                    | 80.749                     | 91.645                      | 80.430         | 79.076        | <b>69.681</b>  |
| Coffee                         | 1.056                   | 0.740                     | 1.228                      | 2.038                       | <b>0.451</b>   | 0.478         | 0.945          |
| Computers                      | 192.741                 | 198.368                   | 162.193                    | 163.533                     | <b>155.350</b> | 164.252       | 158.226        |
| Cricket_X                      | 45.766                  | 33.312                    | 32.477                     | 33.539                      | 33.537         | 32.728        | <b>30.582</b>  |
| Cricket_Y                      | 43.959                  | 31.407                    | 31.865                     | 30.490                      | 31.170         | 32.640        | <b>29.766</b>  |
| Cricket_Z                      | 48.030                  | 34.976                    | 34.390                     | 35.690                      | 33.936         | 34.711        | <b>31.129</b>  |
| DiatomSizeReduction            | 0.161                   | 0.146                     | 0.139                      | 0.576                       | 0.061          | <b>0.055</b>  | 0.760          |
| DistalPhalanxOutlineAgeGroup   | 1.791                   | 1.366                     | 1.573                      | 2.406                       | <b>1.088</b>   | 1.141         | 1.332          |
| DistalPhalanxOutlineCorrect    | 2.643                   | 2.081                     | 2.227                      | 2.453                       | 1.896          | <b>1.842</b>  | 1.874          |
| DistalPhalanxTW                | 1.358                   | 1.010                     | 1.031                      | 1.399                       | <b>0.691</b>   | 0.736         | 0.937          |
| ECG200                         | 7.365                   | 5.677                     | 7.488                      | 6.931                       | 6.171          | 6.262         | <b>5.638</b>   |
| ECG5000                        | 12.282                  | 11.623                    | 13.441                     | 11.390                      | 12.471         | 11.427        | <b>10.567</b>  |
| ECGFiveDays                    | 9.987                   | 8.418                     | 7.821                      | 7.001                       | 7.750          | <b>6.927</b>  | 11.559         |
| Earthquakes                    | 150.271                 | <b>87.765</b>             | 91.644                     | 88.571                      | 88.961         | 88.290        | 89.370         |
| ElectricDevices                | 31.243                  | 28.281                    | 28.409                     | 27.694                      | 27.151         | 27.649        | <b>27.033</b>  |
| FISH                           | 0.913                   | 0.777                     | 0.639                      | 0.692                       | <b>0.487</b>   | 0.497         | 0.789          |
| FaceAll                        | 18.250                  | 15.273                    | 17.053                     | 15.958                      | 13.898         | 14.416        | <b>13.678</b>  |
| FaceFour                       | 28.604                  | 24.447                    | 26.018                     | 27.347                      | 30.171         | 29.341        | <b>22.983</b>  |
| FacesUCR                       | 16.913                  | 14.094                    | 15.200                     | 15.657                      | 12.979         | <b>12.656</b> | 13.025         |
| FordA                          | 63.812                  | 53.893                    | 55.744                     | 55.351                      | 51.829         | 53.025        | <b>51.076</b>  |
| FordB                          | 66.695                  | 56.032                    | 56.154                     | 55.071                      | 52.866         | 53.447        | <b>51.686</b>  |
| Gun_Point                      | 7.586                   | 2.525                     | 2.208                      | 2.354                       | 3.393          | <b>2.113</b>  | 2.259          |
| Ham                            | 25.753                  | 21.942                    | 19.811                     | 20.530                      | 19.482         | 20.669        | <b>19.319</b>  |
| HandOutlines                   | -                       | -                         | -                          | -                           | 2.094          | 1.975         | 2.859          |
| Haptics                        | 19.904                  | 15.475                    | 15.414                     | 16.633                      | <b>12.714</b>  | 14.710        | 14.638         |
| Herring                        | 1.778                   | 1.245                     | 1.520                      | 1.526                       | <b>0.873</b>   | 1.118         | 1.172          |
| InlineSkate                    | 91.103                  | 34.482                    | 25.691                     | 27.585                      | 30.498         | 22.163        | <b>21.671</b>  |
| InsectWingbeatSound            | 14.798                  | 13.418                    | 13.024                     | 12.506                      | 12.148         | 12.407        | <b>11.909</b>  |
| ItalyPowerDemand               | 2.748                   | 2.317                     | 3.343                      | 2.810                       | 2.222          | <b>2.161</b>  | 2.302          |
| LargeKitchenAppliances         | 125.113                 | <b>99.668</b>             | 104.094                    | 100.850                     | 109.575        | 112.017       | 102.100        |
| Lighting2                      | 84.514                  | 73.412                    | 75.298                     | 74.958                      | 72.800         | <b>71.848</b> | 72.641         |
| Lighting7                      | 32.775                  | 27.390                    | 25.715                     | 26.188                      | 25.786         | 25.216        | <b>24.230</b>  |
| MALLAT                         | 4.744                   | 5.130                     | 3.332                      | 4.122                       | 2.091          | <b>1.949</b>  | 3.461          |
| Meat                           | 0.820                   | 0.492                     | 1.046                      | 1.122                       | 0.040          | <b>0.039</b>  | 2.381          |
| MedicalImages                  | 8.110                   | 8.041                     | 8.662                      | 9.552                       | <b>6.188</b>   | 6.900         | 6.477          |
| MiddlePhalanxOutlineAgeGroup   | 0.853                   | 0.748                     | 0.914                      | 1.097                       | <b>0.511</b>   | 0.511         | 0.766          |
| MiddlePhalanxOutlineCorrect    | 0.825                   | 0.652                     | 0.720                      | 1.181                       | <b>0.507</b>   | 0.508         | 0.551          |
| MiddlePhalanxTW                | 0.752                   | 0.584                     | 0.949                      | 1.449                       | 0.416          | <b>0.404</b>  | 0.692          |
| MoteStrain                     | 24.706                  | 22.632                    | <b>19.159</b>              | 20.079                      | 21.629         | 20.790        | 20.155         |
| NonInvasiveFetalECG_Thorax1    | 2.418                   | 2.607                     | 6.163                      | 3.169                       | <b>1.139</b>   | 1.149         | 2.852          |
| NonInvasiveFetalECG_Thorax2    | 2.311                   | 2.169                     | 2.536                      | 2.858                       | 1.088          | <b>1.081</b>  | 2.318          |
| OSULeaf                        | 32.206                  | 21.743                    | 21.641                     | 20.844                      | 20.371         | 19.971        | <b>19.120</b>  |
| OliveOil                       | 1.217                   | 1.180                     | 1.362                      | 4.419                       | 0.018          | <b>0.017</b>  | 1.187          |
| PhalangesOutlinesCorrect       | 1.681                   | 1.312                     | 1.946                      | 1.684                       | <b>1.132</b>   | 1.146         | 1.277          |
| Phoneme                        | 181.389                 | 134.930                   | 135.640                    | 136.674                     | 133.475        | 121.774       | <b>118.926</b> |
| Plane                          | 1.058                   | 0.783                     | 1.202                      | 1.809                       | 0.444          | <b>0.416</b>  | 1.075          |
| ProximalPhalanxOutlineAgeGroup | 0.620                   | 0.530                     | 0.807                      | 0.946                       | 0.352          | <b>0.336</b>  | 0.431          |
| ProximalPhalanxOutlineCorrect  | 0.859                   | 0.707                     | 1.053                      | 1.164                       | <b>0.512</b>   | 0.514         | 0.537          |
| ProximalPhalanxTW              | 0.630                   | 0.513                     | 0.645                      | 1.089                       | <b>0.247</b>   | 0.261         | 0.800          |
| RefrigerationDevices           | 182.659                 | 156.169                   | 151.285                    | 149.829                     | 152.254        | 155.795       | <b>137.791</b> |
| ScreenType                     | 187.460                 | 156.534                   | 155.496                    | 155.359                     | <b>151.867</b> | 158.273       | 153.550        |
| ShapeletSim                    | 236.166                 | 123.055                   | 124.282                    | 127.652                     | 122.746        | 123.699       | <b>111.356</b> |
| ShapesAll                      | 15.045                  | 8.828                     | 7.745                      | 8.333                       | 8.755          | 8.929         | <b>7.448</b>   |
| SmallKitchenAppliances         | 184.888                 | 177.515                   | 181.719                    | <b>177.369</b>              | 177.863        | 181.845       | 179.879        |
| SonyAIBORobotSurface           | 8.765                   | 6.722                     | 7.511                      | 7.685                       | <b>5.876</b>   | 6.252         | 6.663          |
| SonyAIBORobotSurfaceII         | 11.896                  | 10.897                    | 12.207                     | 12.315                      | <b>9.463</b>   | 9.754         | 11.239         |
| StarLightCurves                | 16.522                  | 9.449                     | 6.834                      | 6.645                       | 6.557          | <b>6.156</b>  | 6.448          |
| Strawberry                     | 2.034                   | 1.642                     | 1.315                      | 1.704                       | 1.225          | <b>1.223</b>  | 1.489          |
| SwedishLeaf                    | 2.891                   | 2.124                     | 2.419                      | 2.400                       | <b>1.887</b>   | 1.936         | 2.149          |
| Symbols                        | 2.140                   | 1.012                     | <b>0.798</b>               | 1.212                       | 1.133          | 0.882         | 1.573          |
| ToeSegmentation1               | 35.839                  | 29.387                    | 27.285                     | 26.861                      | 27.618         | 30.725        | <b>26.201</b>  |
| ToeSegmentation2               | 36.316                  | 26.012                    | 23.562                     | 22.410                      | 24.837         | 24.226        | <b>21.764</b>  |
| Trace                          | 2.169                   | 2.206                     | 1.249                      | 1.374                       | <b>0.767</b>   | 0.964         | 0.981          |
| TwoLeadECG                     | 1.616                   | 1.354                     | 1.900                      | 1.349                       | <b>1.015</b>   | 1.118         | 1.084          |
| Two_Patterns                   | 12.811                  | 10.047                    | 8.079                      | <b>7.850</b>                | 8.528          | 9.718         | 8.010          |
| UWaveGestureLibraryAll         | 77.858                  | 46.754                    | 43.451                     | 42.883                      | 42.470         | 43.537        | <b>37.055</b>  |
| Wine                           | 0.738                   | 0.517                     | 0.633                      | 1.109                       | <b>0.112</b>   | 0.113         | 0.435          |
| WordsSynonyms                  | 17.235                  | 11.125                    | 10.347                     | 10.832                      | 12.036         | 11.489        | <b>8.428</b>   |
| Worms                          | 107.089                 | 73.280                    | 68.799                     | 74.002                      | 75.779         | 80.812        | <b>60.592</b>  |
| WormsTwoClass                  | 128.791                 | 86.165                    | 82.996                     | 82.916                      | 83.880         | 90.286        | <b>77.192</b>  |
| synthetic_control              | 16.805                  | 8.880                     | 8.886                      | 9.295                       | 8.924          | 8.926         | <b>8.328</b>   |
| uWaveGestureLibrary_X          | 33.867                  | 20.419                    | 19.155                     | 19.131                      | 18.673         | 19.393        | <b>17.997</b>  |
| uWaveGestureLibrary_Y          | 35.155                  | 19.121                    | 16.982                     | 17.484                      | 18.505         | 16.598        | <b>15.786</b>  |
| uWaveGestureLibrary_Z          | 33.574                  | 19.668                    | 18.401                     | 18.701                      | 18.693         | 18.248        | <b>16.934</b>  |
| wafer                          | 30.883                  | <b>21.369</b>             | 24.101                     | 25.974                      | 23.579         | 31.298        | 24.725         |
| yoga                           | 33.428                  | 14.453                    | 14.055                     | 11.822                      | 11.343         | 12.424        | <b>10.882</b>  |

Table 3: Barycenter Experiment, Average DTW Loss on Testing Set

|                                | SoftDTW<br>$\gamma = 1$ | SoftDTW<br>$\gamma = 0.1$ | SoftDTW<br>$\gamma = 0.01$ | SoftDTW<br>$\gamma = 0.001$ | SSG            | DBA            | Ours           |
|--------------------------------|-------------------------|---------------------------|----------------------------|-----------------------------|----------------|----------------|----------------|
| 50words                        | 13.770                  | 11.642                    | 11.031                     | 10.913                      | 11.162         | 11.195         | <b>10.709</b>  |
| Adiac                          | 0.838                   | 0.305                     | 0.285                      | 0.585                       | <b>0.245</b>   | 0.256          | 0.564          |
| ArrowHead                      | 5.427                   | 4.402                     | 3.690                      | <b>3.478</b>                | 3.766          | 3.688          | 4.009          |
| Beef                           | 14.946                  | 14.178                    | 9.814                      | 11.599                      | 14.822         | 12.016         | <b>8.813</b>   |
| BeetleFly                      | 53.030                  | 38.986                    | <b>36.598</b>              | 38.443                      | 41.506         | 40.907         | 36.863         |
| BirdChicken                    | 43.657                  | <b>19.897</b>             | 22.499                     | 20.594                      | 36.865         | 30.522         | 22.585         |
| CBF                            | 24.343                  | 15.210                    | 17.237                     | 15.566                      | 14.194         | 14.596         | <b>13.755</b>  |
| Car                            | 4.355                   | 3.072                     | 2.723                      | 2.753                       | 2.654          | <b>2.462</b>   | 2.573          |
| ChlorineConcentration          | 25.474                  | 17.345                    | 18.659                     | 17.919                      | <b>16.459</b>  | 17.341         | 16.492         |
| CinC_ECG_torso                 | 180.663                 | 141.548                   | 141.753                    | 132.553                     | 166.838        | 136.126        | <b>128.023</b> |
| Coffee                         | 1.226                   | 0.826                     | 1.293                      | 1.577                       | 0.658          | <b>0.654</b>   | 1.045          |
| Computers                      | 176.868                 | 157.962                   | 148.396                    | 153.658                     | <b>146.668</b> | 153.739        | 159.314        |
| Cricket_X                      | 51.207                  | 37.780                    | 38.551                     | 37.916                      | 36.245         | 37.398         | <b>36.214</b>  |
| Cricket_Y                      | 43.451                  | 34.059                    | 33.094                     | 33.679                      | <b>32.414</b>  | 33.642         | 32.629         |
| Cricket_Z                      | 48.466                  | 36.712                    | 36.351                     | 37.211                      | 36.525         | 36.586         | <b>35.056</b>  |
| DiatomSizeReduction            | 4.010                   | 4.024                     | 3.902                      | <b>3.896</b>                | 3.899          | 3.907          | 4.246          |
| DistalPhalanxOutlineAgeGroup   | 1.523                   | 1.304                     | 1.526                      | 2.036                       | <b>1.061</b>   | 1.065          | 1.841          |
| DistalPhalanxOutlineCorrect    | 2.785                   | 2.351                     | 2.750                      | 2.557                       | 1.958          | <b>1.956</b>   | 1.979          |
| DistalPhalanxTW                | 1.405                   | 0.997                     | 1.977                      | 1.705                       | 0.806          | <b>0.806</b>   | 1.179          |
| ECG200                         | 9.344                   | 7.555                     | 8.911                      | 8.784                       | 7.780          | 8.422          | <b>6.959</b>   |
| ECG5000                        | 26.295                  | 22.558                    | 22.592                     | 24.241                      | 25.302         | 27.389         | <b>22.372</b>  |
| ECGFiveDays                    | 8.767                   | 10.175                    | 10.589                     | 10.965                      | 7.422          | <b>7.336</b>   | 8.647          |
| Earthquakes                    | 156.759                 | 110.492                   | 108.953                    | 109.385                     | 106.678        | <b>102.084</b> | 107.288        |
| ElectricDevices                | 43.261                  | 37.808                    | 37.130                     | 37.421                      | 36.852         | 36.939         | <b>35.069</b>  |
| FISH                           | 1.808                   | 1.661                     | 1.535                      | 1.682                       | 1.464          | <b>1.422</b>   | 1.652          |
| FaceAll                        | 20.162                  | 18.590                    | 19.029                     | 20.625                      | 17.536         | <b>17.428</b>  | 19.027         |
| FaceFour                       | 38.929                  | 38.416                    | 40.709                     | 40.024                      | <b>36.045</b>  | 39.897         | 39.898         |
| FacesUCR                       | 20.339                  | 19.555                    | 20.671                     | 20.296                      | 17.635         | <b>17.090</b>  | 18.105         |
| FordA                          | 65.742                  | 56.997                    | 55.973                     | 55.459                      | 53.513         | 53.965         | <b>52.667</b>  |
| FordB                          | 69.145                  | 60.406                    | 61.231                     | 59.489                      | 57.921         | 58.954         | <b>56.693</b>  |
| Gun_Point                      | 8.030                   | 2.816                     | 2.478                      | 2.428                       | 3.172          | 2.796          | <b>2.315</b>   |
| Ham                            | 31.478                  | 28.953                    | 26.317                     | 30.149                      | 26.639         | 26.455         | <b>25.510</b>  |
| HandOutlines                   | -                       | -                         | -                          | -                           | 10.864         | 10.794         | 7.733          |
| Haptics                        | 25.431                  | 22.077                    | 20.684                     | 21.966                      | <b>17.196</b>  | 17.926         | 24.014         |
| Herring                        | 1.465                   | 1.385                     | 1.331                      | 1.462                       | <b>0.915</b>   | 0.948          | 1.372          |
| InlineSkate                    | 127.648                 | 65.537                    | 48.215                     | 45.301                      | 58.181         | 55.270         | <b>40.608</b>  |
| InsectWingbeatSound            | 17.576                  | 16.680                    | 15.102                     | <b>15.010</b>               | 16.210         | 15.079         | 15.493         |
| ItalyPowerDemand               | 2.523                   | 2.578                     | 2.523                      | 2.820                       | <b>2.147</b>   | 2.705          | 2.369          |
| LargeKitchenAppliances         | 118.456                 | 114.174                   | <b>107.120</b>             | 107.325                     | 122.776        | 131.369        | 110.499        |
| Lighting2                      | 86.450                  | 75.184                    | <b>72.139</b>              | 81.725                      | 78.196         | 78.350         | 73.070         |
| Lighting7                      | 48.326                  | 37.158                    | <b>36.557</b>              | 38.376                      | 37.673         | 37.747         | 41.663         |
| MALLAT                         | 6.002                   | 4.692                     | 4.717                      | 6.280                       | 3.668          | <b>3.379</b>   | 4.938          |
| Meat                           | 0.593                   | 0.259                     | 0.438                      | 1.569                       | 0.041          | <b>0.041</b>   | 0.470          |
| MedicalImages                  | 8.252                   | 8.807                     | 9.334                      | 8.741                       | 7.194          | <b>6.916</b>   | 7.762          |
| MiddlePhalanxOutlineAgeGroup   | 0.835                   | 0.770                     | 1.540                      | 1.158                       | <b>0.723</b>   | 0.733          | 0.962          |
| MiddlePhalanxOutlineCorrect    | 1.235                   | 1.223                     | 1.145                      | 2.254                       | 1.187          | 1.200          | <b>0.998</b>   |
| MiddlePhalanxTW                | 0.836                   | 0.729                     | 1.054                      | 1.051                       | 0.592          | <b>0.570</b>   | 0.694          |
| MoteStrain                     | 22.970                  | 23.938                    | 22.080                     | 24.643                      | 21.964         | <b>21.094</b>  | 25.032         |
| NonInvasiveFetalECG_Thorax1    | 2.745                   | 2.919                     | 3.560                      | 3.890                       | 1.548          | <b>1.509</b>   | 3.561          |
| NonInvasiveFetalECG_Thorax2    | 2.384                   | 2.888                     | 3.146                      | 3.711                       | <b>1.465</b>   | 1.521          | 2.955          |
| OSULeaf                        | 35.193                  | 26.392                    | 23.544                     | 24.177                      | 25.619         | <b>23.188</b>  | 23.352         |
| OliveOil                       | 0.961                   | 0.747                     | 2.107                      | 2.002                       | 0.020          | <b>0.020</b>   | 1.082          |
| PhalangesOutlinesCorrect       | 2.067                   | 1.556                     | 1.782                      | 1.487                       | 1.254          | <b>1.239</b>   | 1.251          |
| Phoneme                        | 315.058                 | 291.260                   | <b>286.486</b>             | 286.661                     | 319.069        | 311.551        | 289.715        |
| Plane                          | 1.171                   | 0.752                     | 1.247                      | 1.572                       | <b>0.534</b>   | 0.553          | 1.109          |
| ProximalPhalanxOutlineAgeGroup | 0.595                   | 0.461                     | 0.735                      | 1.230                       | 0.356          | <b>0.351</b>   | 0.521          |
| ProximalPhalanxOutlineCorrect  | 0.704                   | 0.587                     | 0.659                      | 1.020                       | <b>0.432</b>   | 0.435          | 0.536          |
| ProximalPhalanxTW              | 0.775                   | 0.586                     | 0.707                      | 1.699                       | <b>0.343</b>   | 0.348          | 0.815          |
| RefrigerationDevices           | 198.045                 | 167.040                   | 162.204                    | 164.149                     | 164.174        | 174.493        | <b>156.454</b> |
| ScreenType                     | 143.046                 | <b>119.853</b>            | 126.123                    | 124.484                     | 123.647        | 136.127        | 135.216        |
| ShapeletSim                    | 243.103                 | 150.826                   | 151.325                    | 152.915                     | 153.454        | 153.326        | <b>146.383</b> |
| ShapesAll                      | 21.230                  | 15.139                    | 12.812                     | 12.824                      | 14.086         | 14.084         | <b>12.408</b>  |
| SmallKitchenAppliances         | 176.407                 | 173.053                   | 175.462                    | <b>171.829</b>              | 178.142        | 173.198        | 181.316        |
| SonyAIBORobotSurface           | 8.647                   | 9.489                     | 9.221                      | 10.841                      | 7.459          | <b>7.430</b>   | 7.882          |
| SonyAIBORobotSurfaceII         | 16.137                  | 17.066                    | 16.947                     | 17.336                      | <b>14.439</b>  | 15.585         | 15.215         |
| StarLightCurves                | 17.915                  | 10.925                    | 7.939                      | 7.484                       | 7.457          | 7.376          | <b>7.316</b>   |
| Strawberry                     | 2.706                   | 1.921                     | 2.757                      | 2.635                       | 1.609          | 1.656          | <b>1.599</b>   |
| SwedishLeaf                    | 2.842                   | 2.442                     | 2.483                      | 2.688                       | 2.087          | <b>2.073</b>   | 2.395          |
| Symbols                        | 6.280                   | 5.245                     | 3.973                      | <b>3.930</b>                | 5.395          | 4.862          | 4.498          |
| ToeSegmentation1               | 43.606                  | 36.174                    | 34.410                     | 35.602                      | 35.703         | 36.982         | <b>34.158</b>  |
| ToeSegmentation2               | 72.831                  | 58.728                    | <b>47.650</b>              | 51.515                      | 54.558         | 57.188         | 53.725         |
| Trace                          | 2.879                   | 1.720                     | 1.374                      | 1.448                       | <b>0.818</b>   | 0.963          | 1.048          |
| TwoLeadECG                     | 1.619                   | 1.275                     | 1.441                      | 1.708                       | <b>1.185</b>   | 1.238          | 1.383          |
| Two_Patterns                   | 12.546                  | 9.490                     | 8.107                      | <b>8.012</b>                | 9.502          | 8.415          | 8.943          |
| UWaveGestureLibraryAll         | 78.820                  | 51.054                    | 46.568                     | 47.568                      | 45.660         | 47.290         | <b>41.052</b>  |
| Wine                           | 0.807                   | 0.549                     | 2.339                      | 1.202                       | 0.103          | <b>0.101</b>   | 0.765          |
| WordsSynonyms                  | 25.751                  | 18.486                    | 17.173                     | 16.387                      | 20.113         | 19.359         | <b>16.247</b>  |
| Worms                          | 169.897                 | 111.593                   | 99.132                     | 97.843                      | 123.028        | 111.755        | <b>94.781</b>  |
| WormsTwoClass                  | 172.790                 | 119.187                   | 110.483                    | <b>105.179</b>              | 114.444        | 113.869        | 105.696        |
| synthetic_control              | 17.031                  | 9.794                     | 9.631                      | 9.806                       | 9.620          | 9.692          | <b>9.126</b>   |
| uWaveGestureLibrary_X          | 34.245                  | 21.273                    | 19.248                     | 19.091                      | 20.334         | 20.586         | <b>18.738</b>  |
| uWaveGestureLibrary_Y          | 37.343                  | 20.565                    | 19.212                     | 18.875                      | 19.129         | 19.481         | <b>17.015</b>  |
| uWaveGestureLibrary_Z          | 35.221                  | 22.716                    | 20.444                     | 20.108                      | 20.072         | 21.296         | <b>18.303</b>  |
| wafer                          | 30.642                  | <b>23.935</b>             | 27.221                     | 24.758                      | 30.820         | 32.328         | 24.577         |
| yoga                           | 24.982                  | 14.573                    | 15.286                     | 11.849                      | 11.681         | 11.887         | <b>11.120</b>  |
